# Supplementary material for: Dynamic Cerebral Autoregulation Post Endovascular Thrombectomy in Acute Ischemic Stroke
Source: PubMed Central journal article supplement (PMC7564150; doi:10.3390/brainsci10090641), 2020-09-16
Supplement: brainsci-10-00641-s001.pdf [file brainsci-10-00641-s001.pdf]

Brief Report

## Dynamic Cerebral Autoregulation Post Endovascular Thrombectomy in Acute Ischemic Stroke - Supplementary

**Supplemental Table 1.** Coherence, gain, and phase calculated for the VLF (very low frequency) band (0.02–0.03 Hz) and LF (low frequency) band (0.03–0.07 Hz) for subjects and controls at each time-point. Ipsilateral and contralateral hemisphere results are shown.

### Coherence.

| VLF (0.02–0.03 Hz) |    |       |       |       |       | LF (0.03–0.07 Hz) |    |       |       |       |       |
|--------------------|----|-------|-------|-------|-------|-------------------|----|-------|-------|-------|-------|
|                    | N  | Mean  | SD    | SE    | CI    |                   | N  | Mean  | SD    | SE    | CI    |
| <b>&lt;24 h</b>    |    |       |       |       |       | <b>&lt;24 h</b>   |    |       |       |       |       |
| Ipsilateral        | 61 | 0.504 | 0.248 | 0.032 | 0.063 | Ipsilateral       | 61 | 0.541 | 0.209 | 0.027 | 0.054 |
| Contralateral      | 59 | 0.453 | 0.241 | 0.031 | 0.063 | Contralateral     | 59 | 0.517 | 0.196 | 0.026 | 0.051 |
| <b>24–72 h</b>     |    |       |       |       |       | <b>24–72 h</b>    |    |       |       |       |       |
| Ipsilateral        | 41 | 0.563 | 0.262 | 0.041 | 0.083 | Ipsilateral       | 41 | 0.593 | 0.207 | 0.032 | 0.065 |
| Contralateral      | 41 | 0.531 | 0.234 | 0.037 | 0.074 | Contralateral     | 41 | 0.552 | 0.194 | 0.030 | 0.061 |
| <b>72–96 h</b>     |    |       |       |       |       | <b>72–96 h</b>    |    |       |       |       |       |
| Ipsilateral        | 24 | 0.550 | 0.244 | 0.050 | 0.103 | Ipsilateral       | 24 | 0.553 | 0.167 | 0.034 | 0.070 |
| Contralateral      | 24 | 0.530 | 0.258 | 0.053 | 0.109 | Contralateral     | 24 | 0.517 | 0.176 | 0.036 | 0.074 |
| <b>&gt;96 h</b>    |    |       |       |       |       | <b>&gt;96 h</b>   |    |       |       |       |       |
| Ipsilateral        | 19 | 0.454 | 0.216 | 0.050 | 0.104 | Ipsilateral       | 19 | 0.461 | 0.167 | 0.038 | 0.081 |
| Contralateral      | 19 | 0.438 | 0.225 | 0.052 | 0.109 | Contralateral     | 19 | 0.393 | 0.174 | 0.040 | 0.084 |

### Gain.

| VLF (0.02–0.03 Hz) |    |       |       |       |       | LF (0.03–0.07 Hz) |    |       |       |       |       |
|--------------------|----|-------|-------|-------|-------|-------------------|----|-------|-------|-------|-------|
|                    | N  | Mean  | SD    | SE    | CI    |                   | N  | Mean  | SD    | SE    | CI    |
| <b>&lt;24 h</b>    |    |       |       |       |       | <b>&lt;24 h</b>   |    |       |       |       |       |
| Ipsilateral        | 61 | 0.526 | 0.361 | 0.046 | 0.092 | Ipsilateral       | 61 | 0.563 | 0.374 | 0.048 | 0.096 |
| Contralateral      | 59 | 0.551 | 0.364 | 0.047 | 0.095 | Contralateral     | 59 | 0.587 | 0.308 | 0.040 | 0.080 |
| <b>24–72 h</b>     |    |       |       |       |       | <b>24–72 h</b>    |    |       |       |       |       |
| Ipsilateral        | 41 | 0.554 | 0.339 | 0.053 | 0.107 | Ipsilateral       | 41 | 0.539 | 0.287 | 0.045 | 0.091 |
| Contralateral      | 41 | 0.648 | 0.324 | 0.051 | 0.102 | Contralateral     | 41 | 0.591 | 0.249 | 0.039 | 0.079 |
| <b>72–96 h</b>     |    |       |       |       |       | <b>72–96 h</b>    |    |       |       |       |       |
| Ipsilateral        | 24 | 0.696 | 0.467 | 0.095 | 0.197 | Ipsilateral       | 24 | 0.714 | 0.284 | 0.058 | 0.120 |
| Contralateral      | 24 | 0.823 | 0.567 | 0.116 | 0.239 | Contralateral     | 24 | 0.875 | 0.451 | 0.092 | 0.191 |
| <b>&gt;96 h</b>    |    |       |       |       |       | <b>&gt;96 h</b>   |    |       |       |       |       |
| Ipsilateral        | 19 | 0.646 | 0.332 | 0.076 | 0.160 | Ipsilateral       | 19 | 0.668 | 0.312 | 0.071 | 0.150 |
| Contralateral      | 19 | 0.670 | 0.363 | 0.083 | 0.175 | Contralateral     | 19 | 0.631 | 0.312 | 0.072 | 0.150 |

## Phase.

| VLF (0.02–0.03 Hz) |    |       |       |       |       | LF (0.03–0.07 Hz) |    |       |       |       |       |
|--------------------|----|-------|-------|-------|-------|-------------------|----|-------|-------|-------|-------|
|                    | N  | Mean  | SD    | SE    | CI    |                   | N  | Mean  | SD    | SE    | CI    |
| <b>&lt;24 h</b>    |    |       |       |       |       | <b>&lt;24 h</b>   |    |       |       |       |       |
| Ipsilateral        | 61 | 0.581 | 0.723 | 0.093 | 0.185 | Ipsilateral       | 61 | 0.684 | 0.498 | 0.064 | 0.127 |
| Contralateral      | 59 | 0.649 | 0.911 | 0.119 | 0.237 | Contralateral     | 59 | 0.918 | 0.498 | 0.065 | 0.130 |
| <b>24–72 h</b>     |    |       |       |       |       | <b>24–72 h</b>    |    |       |       |       |       |
| Ipsilateral        | 41 | 0.452 | 0.881 | 0.138 | 0.278 | Ipsilateral       | 41 | 0.689 | 0.552 | 0.086 | 0.174 |
| Contralateral      | 41 | 0.565 | 0.848 | 0.132 | 0.268 | Contralateral     | 41 | 0.860 | 0.471 | 0.074 | 0.149 |
| <b>72–96 h</b>     |    |       |       |       |       | <b>72–96 h</b>    |    |       |       |       |       |
| Ipsilateral        | 24 | 0.440 | 0.898 | 0.183 | 0.379 | Ipsilateral       | 24 | 0.648 | 0.563 | 0.115 | 0.238 |
| Contralateral      | 24 | 0.513 | 0.811 | 0.166 | 0.343 | Contralateral     | 24 | 0.713 | 0.687 | 0.140 | 0.290 |
| <b>&gt;96 h</b>    |    |       |       |       |       | <b>&gt;96 h</b>   |    |       |       |       |       |
| Ipsilateral        | 19 | 0.713 | 0.989 | 0.227 | 0.476 | Ipsilateral       | 19 | 0.704 | 0.606 | 0.139 | 0.292 |
| Contralateral      | 19 | 0.525 | 1.027 | 0.236 | 0.495 | Contralateral     | 19 | 0.668 | 0.644 | 0.148 | 0.311 |
